# Supplementary material for: The new timing in acute care surgery (new TACS) classification: a WSES Delphi consensus study
Source: Springer Nature journal article supplement (doi:10.1186/s13017-023-00499-3), 2023-04-28
Supplement: MOESM3 [file 25296732]

|                                         |                                     |                         | II ROUND<br>DELPHI                         |          |                                       |          |                           |                 |
|-----------------------------------------|-------------------------------------|-------------------------|--------------------------------------------|----------|---------------------------------------|----------|---------------------------|-----------------|
| <b>COLOR CODE</b>                       | <b>Surgical disease/ conditions</b> | <b>Decision I ROUND</b> | <b>Likert scale 4 (near totally agree)</b> | <b>%</b> | <b>Likert scale 5 (totally agree)</b> | <b>%</b> | <b>Likert scale 5/4+5</b> | <b>Decision</b> |
| <b>RED CODE-<br/>immediate surgery</b>  | <b>blunt and penetrating trauma</b> | <b>INCLUDED</b>         | -                                          |          | -                                     | -        |                           | -               |
|                                         | <b>postoperative hemorrhage</b>     | <b>INCLUDED</b>         | -                                          | -        | -                                     | -        |                           | -               |
|                                         | <b>post-partum hemorrhage</b>       | <b>INCLUDED</b>         | -                                          | -        | -                                     | -        |                           | -               |
|                                         | <b>ruptured aneurysm</b>            | <b>INCLUDED</b>         | -                                          | -        | -                                     | -        |                           | -               |
|                                         | <b>Tension pneumothorax</b>         | <b>INCLUDED</b>         | -                                          | -        | -                                     | -        |                           | -               |
| <b>ORANGE CODE-surgery within 1 hrs</b> | <b>acute mesenteric ischemia</b>    | <b>INCLUDED</b>         | -                                          | -        | -                                     | -        |                           | -               |

|                                   |                                                      |                 |       |      |       |    |      |                                                       |
|-----------------------------------|------------------------------------------------------|-----------------|-------|------|-------|----|------|-------------------------------------------------------|
|                                   | <b>acute limbs ischemia</b>                          | <b>INCLUDED</b> | -     | -    | -     | -  |      | -                                                     |
|                                   | <b>graft thrombosis</b>                              | <b>INCLUDED</b> | -     | -    | -     | -  |      | -                                                     |
|                                   | <b>testicular torsion</b>                            | <b>INCLUDED</b> | -     | -    | -     | -  |      | -                                                     |
|                                   | <b>retained placenta with acute bleeding</b>         | <b>INCLUDED</b> | -     | -    | -     | -  |      | -                                                     |
| <b>Patients with septic shock</b> | <b>GI perforation</b>                                | <b>INCLUDED</b> | -     | -    | -     | -  |      | -                                                     |
|                                   | <b>Infected necrotizing haemorrhage pancreatitis</b> | <b>II ROUND</b> | 8/51  | 15.7 | 22/51 | 43 | 58.7 | <b>Not included, but why? Better definition ? III</b> |
|                                   | <b>Urolithiasis complicated by hydronephrosis</b>    | <b>II ROUND</b> | 14/51 | 27.5 | 22/51 | 43 | 70.5 | <b>Not included, better definition ? III</b>          |
|                                   | <b>Fournier's gangrene</b>                           | <b>INCLUDED</b> | -     | -    | -     | -  |      |                                                       |

|                         |                                      |                 |       |      |       |    |      |                                                                                       |
|-------------------------|--------------------------------------|-----------------|-------|------|-------|----|------|---------------------------------------------------------------------------------------|
|                         | <b>toxic megacolon</b>               | <b>INCLUDED</b> | -     | -    | -     | -  |      |                                                                                       |
|                         | <b>anastomotic fistula</b>           | <b>INCLUDED</b> | -     | -    | -     | -  |      |                                                                                       |
|                         | <b>necrotizing fascitis</b>          | <b>INCLUDED</b> | -     | -    | -     | -  |      |                                                                                       |
|                         | <b>ruptured tubo-ovarian abscess</b> | <b>II ROUND</b> | 12/51 | 23.5 | 24/51 | 47 | 70.5 | <b>Not included, why if patient is in septic shock?<br/>Better definition<br/>III</b> |
|                         | <b>Incomplete abortion</b>           | <b>II ROUND</b> | 13/51 | 25.5 | 24/51 | 47 | 72.5 | <b>III</b>                                                                            |
|                         | <b>Perianal abscess</b>              | <b>II ROUND</b> | 12/51 | 23.5 | 26/51 | 51 | 74.5 | <b>III</b>                                                                            |
| <b>Other conditions</b> | <b>pneumothorax</b>                  | <b>INCLUDED</b> | -     | -    | -     |    |      |                                                                                       |
|                         | <b>heart lung transplants</b>        | <b>INCLUDED</b> | -     | -    | -     |    |      |                                                                                       |

|                                                      |                                                                           |                             |       |      |       |          |             |                      |
|------------------------------------------------------|---------------------------------------------------------------------------|-----------------------------|-------|------|-------|----------|-------------|----------------------|
| <b>YELLOW-<br/>surgery within 3/6<br/>hrs</b>        | <b>Gangrenous<br/>cholecystitis</b>                                       | <b>II ROUND<br/>(added)</b> | 15/51 | 29.4 | 26/51 | 56.<br>9 | 86.3        | <b>INCLUD<br/>ED</b> |
|                                                      | <b>spinal cord<br/>compression<br/>with cauda<br/>equina<br/>syndrome</b> | <b>INCLUDED</b>             | -     | -    | -     |          |             |                      |
| <b>Patients with<br/>sepsis associated<br/>with:</b> | <b>Fournier's<br/>gangrene</b>                                            | <b>II ROUND</b>             | 6/51  | 11.8 | 35/51 | 68.<br>6 | <b>80.4</b> | <b>INCLUD<br/>ED</b> |
|                                                      | <b>toxic<br/>megacolon</b>                                                | <b>II ROUND</b>             | 15/51 | 29.4 | 31/51 | 60.<br>8 | <b>90.2</b> | <b>INCLUD<br/>ED</b> |
|                                                      | <b>anastomotic fis<br/>tula with local<br/>peritonitis</b>                | <b>II ROUND</b>             | 18/51 | 35.3 | 17/51 | 33       | 68.3        | <b>III</b>           |
|                                                      | <b>necrotizing<br/>fascitis</b>                                           | <b>II ROUND</b>             | 8/51  | 15.7 | 33/51 | 64.<br>7 | <b>80.4</b> | <b>INCLUD<br/>ED</b> |
|                                                      | <b>GI perforation</b>                                                     | <b>II ROUND</b>             | 6/51  | 11.8 | 39/51 | 76.<br>5 | <b>88.3</b> | <b>INCLUD<br/>ED</b> |
|                                                      | <b>Ruptured<br/>tubo-ovarian<br/>abscess</b>                              | <b>II ROUND</b>             | 16/51 | 31.4 | 26/51 | 51       | <b>82.4</b> | <b>INCLUD<br/>ED</b> |

|                         |                                             |                 |       |      |       |      |             |                                    |
|-------------------------|---------------------------------------------|-----------------|-------|------|-------|------|-------------|------------------------------------|
|                         | <b>complicated appendicitis</b>             | <b>II ROUND</b> | 16/51 | 31.4 | 21/51 | 41.2 | 72.6        | <b>Better definition?III</b>       |
|                         | <b>Complicated diverticulitis</b>           | <b>II ROUND</b> | 16/51 | 31.4 | 17/51 | 33.3 | 64.7        | <b>Better definition?III</b>       |
|                         | <b>Urolithiasis with sepsis</b>             | <b>II ROUND</b> | 13/51 | 25.5 | 17/51 | 33.3 | 58.8        | <b>Better definition?III</b>       |
|                         | <b>Incomplete abortion</b>                  | <b>II ROUND</b> | 15/51 | 29.4 | 27/51 | 52.9 | <b>82.3</b> | <b>INCLUDED</b>                    |
|                         | <b>Perianal abscess with sepsis</b>         | <b>II ROUND</b> | 17/51 | 33.3 | 20/51 | 39.2 | 72.5        | <b>Better definition?III</b>       |
| <b>Other conditions</b> | <b>Intraperitoneal bladder rupture</b>      | <b>II ROUND</b> | 18/51 | 35.3 | 19/51 | 37.3 | 72.3        | <b>Why? Patient in sepsis? III</b> |
|                         | <b>compartment syndrome (any districts)</b> | <b>II ROUND</b> | 8/51  | 15.7 | 34/51 | 66.7 | <b>82.4</b> | <b>INCLUDED</b>                    |

|                                    |                                                         |                       |       |      |       |      |      |                               |
|------------------------------------|---------------------------------------------------------|-----------------------|-------|------|-------|------|------|-------------------------------|
|                                    | foreign body with GUT obstruction (including endoscopy) | <b>II ROUND</b>       | 18/51 | 35.3 | 15/51 | 29.4 | 64.7 | <b>Better definition? III</b> |
|                                    | liver transplant                                        | <b>INCLUDED</b>       | -     | -    | -     | -    |      | -                             |
|                                    | Embolization of post-traumatic pseudoaneurysm           | <b>II ROUND added</b> | 16/51 | 31.4 | 21/51 | 41.2 | 72.6 | <b>III</b>                    |
| <b>GREEN-surgery within 12 hrs</b> | bowel/intestinal obstruction                            | <b>II ROUND</b>       | 15/51 | 29.4 | 19/51 | 37.3 | 66.7 | <b>? III</b>                  |
|                                    | Perianal abscess                                        | <b>II ROUND</b>       | 12/51 | 23.5 | 21/51 | 41.2 | 64.7 | <b>? III</b>                  |
|                                    | Cholecystitis                                           | <b>II ROUND</b>       | 13/51 | 25.5 | 18/51 | 35.3 | 60.8 | <b>? III</b>                  |

|                                                      |                 |       |      |       |      |             |                  |
|------------------------------------------------------|-----------------|-------|------|-------|------|-------------|------------------|
| <b>Appendicitis with systemic signs of infection</b> | <b>II ROUND</b> | 11/51 | 21.6 | 32/51 | 62.7 | <b>84.3</b> | <b>INCLUDED</b>  |
| <b>Thoracic empyema</b>                              | <b>INCLUDED</b> | -     | -    | -     |      |             | -                |
| <b>incarcerated hernia with obstruction</b>          | <b>II ROUND</b> | 9/51  | 17.6 | 28/51 | 54.9 | 72.5        | <b>? III</b>     |
| <b>Urinary fistula</b>                               | <b>II ROUND</b> | 9/51  | 17.6 | 11/51 | 21.6 | 39.2        | <b>Cancelled</b> |
| <b>Hydronephrosis (stent placement)</b>              | <b>II ROUND</b> | 13/51 | 25.5 | 16/51 | 31.4 | 56.9        | <b>? III</b>     |
| <b>Urolithiasis with acute kidney injury</b>         | <b>II ROUND</b> | 13/51 | 25.5 | 16/51 | 31.4 | 56.9        | <b>? III</b>     |
| <b>kidney and pancreatic transplant</b>              | <b>II ROUND</b> | 13/51 | 25.5 | 21/51 | 41.2 | 66.7        | <b>? III</b>     |

|                                          |                                                                            |                 |      |      |       |      |      |                 |
|------------------------------------------|----------------------------------------------------------------------------|-----------------|------|------|-------|------|------|-----------------|
|                                          | foreign body without obstruction                                           | <b>II ROUND</b> | 9/51 | 17.6 | 12/51 | 23.5 | 41.1 | <b>Canceled</b> |
| <b>BLUE CODE-surgery within 24-48hrs</b> | 2nd look laparotomy                                                        | <b>INCLUDED</b> | -    | -    | -     | -    |      | -               |
|                                          | cholecystectomy after ERCP for stones migration or recurrent biliary colic | <b>INCLUDED</b> | -    | -    | -     | -    |      | -               |
|                                          | Uncomplicated appendicitis                                                 | <b>II ROUND</b> | 7/51 | 13.7 | 31/51 | 60.8 | 74.5 | ?<br><b>III</b> |
|                                          | Amputation for osteomyelitis                                               | <b>II ROUND</b> | 6/51 | 11.8 | 30/51 | 58.8 | 70.6 | ?<br><b>III</b> |
|                                          | A-V fistulae for hemodialysis                                              | <b>II ROUND</b> | 8/51 | 15.7 | 28/51 | 54.9 | 70.6 | ?<br><b>III</b> |



|                                                                      |                 |       |      |       |      |             |                 |
|----------------------------------------------------------------------|-----------------|-------|------|-------|------|-------------|-----------------|
| <b>Symptomatic carotid artery stenosis, TIA, STROKE in evolution</b> | <b>II ROUND</b> | 8/51  | 15.7 | 19/51 | 37.3 | 53          | ?<br><b>III</b> |
| <b>Symptomatic AAA after medical treatment failure</b>               | <b>II ROUND</b> | 15/51 | 29.4 | 21/51 | 41.2 | 70.6        | ?<br><b>III</b> |
| <b>Symptomatic aortic dissection type B</b>                          | <b>II ROUND</b> | 9/51  | 17.6 | 21/51 | 41.2 | 58.8        | ?<br><b>III</b> |
| <b>Bones fracture</b>                                                | <b>II ROUND</b> | 13/51 | 25.5 | 22/51 | 43.1 | 68.6        | ?<br><b>III</b> |
| <b>pelvic trauma fixation</b>                                        | <b>II ROUND</b> | 13/51 | 25.5 | 27/51 | 52.9 | <b>78.4</b> | <b>INCLUDED</b> |
| <b>Maxillofacial fractures</b>                                       | <b>II ROUND</b> | 12/51 | 23.5 | 25/51 | 49   | 72.5        | <b>III</b>      |
| <b>Urolithiasis after medical treatment failure</b>                  | <b>II ROUND</b> | 13/51 | 25.5 | 19/51 | 37.3 | 62.8        | ?<br><b>III</b> |

|                               |                                                 |                 |       |      |       |          |             |                      |
|-------------------------------|-------------------------------------------------|-----------------|-------|------|-------|----------|-------------|----------------------|
| <b>ORGANIZATIV<br/>E NEED</b> | <b>Elective<br/>postponed<br/>interventions</b> | <b>II ROUND</b> | 12/51 | 23.5 | 28/51 | 54.<br>9 | <b>82.9</b> | <b>INCLUD<br/>ED</b> |
|                               | <b>diagnostic<br/>biopsy/<br/>laparoscopy</b>   | <b>II ROUND</b> | 9/51  | 17.6 | 30/51 | 58.<br>8 | <b>76.4</b> | <b>INCLUD<br/>ED</b> |
