# Supplementary material for: The new timing in acute care surgery (new TACS) classification: a WSES Delphi consensus study
Source: Springer Nature journal article supplement (doi:10.1186/s13017-023-00499-3), 2023-04-28
Supplement: MOESM5 [file 25296732]

| Class Color-Code                                                                                                                     | Surgical Diseases                          | Likert 4 scale (n.) | %    | Likert 5 scale (n.) | %    | Consensus agreement (Likert 4+5) % | Decision                     |
|--------------------------------------------------------------------------------------------------------------------------------------|--------------------------------------------|---------------------|------|---------------------|------|------------------------------------|------------------------------|
| RED CODE-<br>immediate surgery-patient presenting hemodynamic instability-vascular compromise                                        | Completed                                  |                     |      |                     |      |                                    |                              |
| ORANGE class-<br>Within 1 hour from diagnosis- but as soon as possible, patient stable after target resuscitation, at risk of MOF    | Strangulated AW hernia with bowel ischemia | 5/32                | 15.6 | 21/32               | 65.6 | (5+21) 81.25                       | Included in the ORANGE class |
|                                                                                                                                      | Ovarian torsion with ovarian ischemia      | 11/32               | 34.4 | 16/32               | 50   | (11+16) 84.3                       | Included in the ORANGE class |
|                                                                                                                                      | Urolithiasis with septic shock             | 8/32                | 25.6 | 12/32               | 38.7 | (8+12) 62.5                        | Removed                      |
| YELLOW class-<br>Within 3/6 hours from diagnosis- stable patient with signs of sepsis, at high risk to develop a multi-organ failure | Completed                                  |                     |      |                     |      |                                    |                              |

| <b>Class Color-Code</b>                                                                                                                                                                                                    | <b>Surgical Diseases</b>                                     | <b>Likert 4 scale (n.)</b> | <b>%</b> | <b>Likert 5 scale (n.)</b> | <b>%</b> | <b>Consensus agreement (Likert 4+5) %</b> | <b>Decision</b> |
|----------------------------------------------------------------------------------------------------------------------------------------------------------------------------------------------------------------------------|--------------------------------------------------------------|----------------------------|----------|----------------------------|----------|-------------------------------------------|-----------------|
| GREEN class-<br>Within 12 hours from diagnosis-<br>stable patient with moderate risk of presenting hemodynamic instability and organs failure; admitted in surgical department for prompt medical treatment and monitoring | Completed                                                    |                            |          |                            |          |                                           |                 |
| BLUE class-<br>Within 24/48 hour from diagnosis;<br>stable patient with low risk of presenting organs failure, admitted in surgical department for clinical monitoring and medical treatment                               | Incarcerated AW hernia with obstruction                      | 9/32                       | 28.1     | 10/32                      | 31.3     | (9+10) 59.3                               | Removed         |
|                                                                                                                                                                                                                            | Bowel/intestinal obstruction after medical treatment failure | 6/32                       | 18.8     | 10/32                      | 31.3     | (6+10) 50                                 | Removed         |
