# Supplementary material for: The new timing in acute care surgery (new TACS) classification: a WSES Delphi consensus study
Source: Springer Nature journal article supplement (doi:10.1186/s13017-023-00499-3), 2023-04-28
Supplement: MOESM6 [file 25296732]

|                            |                                                                  |                |    |          |                |    |                                                                       |                            |      |                                                              |                    |      |           |
|----------------------------|------------------------------------------------------------------|----------------|----|----------|----------------|----|-----------------------------------------------------------------------|----------------------------|------|--------------------------------------------------------------|--------------------|------|-----------|
| Patients with septic shock | Other gynecological bleeding(stable patient after resuscitation) | -              | -  | -        | -              | -  | III Round                                                             | 44.2 (Ls 4)<br>23.3 (Ls 5) | 67.5 | Cancelled                                                    |                    |      |           |
|                            | GI perforation                                                   | 60(5)<br>23(4) | 83 | included | -              | -  | -                                                                     | -                          | -    | -                                                            |                    |      |           |
|                            | Infected necrotizing haemorrhage pancreatitis                    | 37(5)<br>20(4) | 57 | II Round | 43(5)<br>15(4) | 58 | III Round                                                             | 25.6 (Ls 4)<br>55.8 (Ls 5) | 81.4 | Included                                                     |                    |      |           |
|                            | Urolithiasis                                                     | 31(5)<br>28(4) | 59 | II       | 33(5)<br>25(4) | 58 | Improved definition for III Round ( <b>urolithiasis with sepsis</b> ) | 48.8(4)<br>30.2(5)         | 79   | Accepted with modifications for redundant items for IV Round | 25.8(4)<br>38.7(5) | 64.5 | Cancelled |

|                                                                                                                                                  |                |     |          |                |    |           |                            |      |                                                 |  |  |  |  |
|--------------------------------------------------------------------------------------------------------------------------------------------------|----------------|-----|----------|----------------|----|-----------|----------------------------|------|-------------------------------------------------|--|--|--|--|
| <b>Fournier's gangrene</b>                                                                                                                       | 62(5)<br>28(4) | 90  | included |                |    |           |                            |      |                                                 |  |  |  |  |
| <b>Toxic megacolon</b>                                                                                                                           | 60(5)<br>28(4) | 88  | included |                |    |           |                            |      |                                                 |  |  |  |  |
| <b>Anastomotic fistula</b>                                                                                                                       | 48(5)<br>28(4) | 76  | included |                |    |           |                            |      |                                                 |  |  |  |  |
| <b>Necrotizing fasciitis</b>                                                                                                                     | 68(5)<br>20(4) | >90 | included |                |    |           |                            |      |                                                 |  |  |  |  |
| <b>Ruptured tubo-ovarian abscess with septic shock</b>                                                                                           | 28(5)<br>34(4) | 62  | II Round | 47(5)<br>23(4) | 70 | III Round | 37.2 (Ls 4)<br>34.9 (Ls 5) | 72.1 | Included after discussion at WSES Congress 2022 |  |  |  |  |
| <b>Complicated appendicitis (necrotic, appendicular abscess, perforated, presence of fecolith) associated with local/generalized peritonitis</b> | -              | -   | -        | -              | -  | III Round | 27.9 (Ls 4)<br>48.8 (Ls 5) | 76.7 | Included                                        |  |  |  |  |



|                                       |                                                           |                |    |          |                |    |          |                            |      |                                                    |  |  |  |
|---------------------------------------|-----------------------------------------------------------|----------------|----|----------|----------------|----|----------|----------------------------|------|----------------------------------------------------|--|--|--|
|                                       | <b>Heart-lungs transplants</b>                            | 65(5)<br>17(4) | 82 | Included | -              | -  | -        | -                          |      | Cancelled after discussion at WSES congress (2022) |  |  |  |
| <b>YEL-LOW-surgery within 3/6 hrs</b> | <b>Contaminated open fractures</b>                        | -              | -  | -        | 54(5)<br>25(4) | 79 | Included |                            |      |                                                    |  |  |  |
|                                       | <b>Spinal cord compression with cauda equina syndrome</b> | 45(5)<br>43(4) | 88 | Included | -              | -  | -        |                            |      |                                                    |  |  |  |
|                                       | Increasing intracranial pressure                          | -              | -  | -        | -              | -  | -        | 27.9 (Ls 4)<br>44.2 (Ls 5) | 72.1 | Cancelled                                          |  |  |  |
| <b>Patients with sepsis</b>           | <b>Fournier's gangrene</b>                                | -              | -  | -        | 68(5)<br>11(4) | 79 | Included | -                          | -    |                                                    |  |  |  |
|                                       | <b>Toxic megacolon</b>                                    | -              | -  | -        | 60(5)<br>29(4) | 89 | Included | -                          | -    |                                                    |  |  |  |

|  |                                                                                                                          |                |    |          |                    |      |           |                            |      |           |  |  |  |
|--|--------------------------------------------------------------------------------------------------------------------------|----------------|----|----------|--------------------|------|-----------|----------------------------|------|-----------|--|--|--|
|  | Intestinal anastomotic fistula/insufficiency with sepsis                                                                 | -              | -  | -        | 33(5)<br>35(4)     | 68   | III Round | 34.9 (Ls 4)<br>37.2 (Ls 5) | 72.1 | Cancelled |  |  |  |
|  | <b>Necrotizing fasciitis</b>                                                                                             | -              | -  | -        | 64(5)<br>15(4)     | 79   | Included  | -                          | -    |           |  |  |  |
|  | <b>GI perforation</b>                                                                                                    | -              | -  | -        | 76.5(5)<br>11.8(4) | 88.3 | Included  |                            |      |           |  |  |  |
|  | <b>Ruptured tubo-ovarian abscess</b>                                                                                     | -              | -  | -        | 51(5)<br>31(4)     | 82   | Included  |                            |      |           |  |  |  |
|  | <b>Complicated appendicitis( necrotic, appendicular abscess, perforated, in presence of fecolith and sign of sepsis)</b> | 51(5)<br>23(4) | 74 | II Round | 41.2(5)<br>31.4(4) | 72.6 | III Round | 37.2 (Ls 4)<br>48.8 (Ls 5) | 86   | Included  |  |  |  |



|  |                                                                |                |    |          |                |    |           |                            |      |           |  |  |  |
|--|----------------------------------------------------------------|----------------|----|----------|----------------|----|-----------|----------------------------|------|-----------|--|--|--|
|  | <b>Complicated diverticulitis with sepsis (Hinchey III-IV)</b> | -              | -  | -        | 33(5)<br>31(4) | 64 | III Round | 34.9 (Ls 4)<br>53.5 (Ls 5) | 88.4 | Included  |  |  |  |
|  | <b>Urolithiasis with sepsis</b>                                | -              | -  | -        | 33(5)<br>25(4) | 58 | III Round | 48.8 (Ls 4)<br>30.2 (Ls 5) | 79   | Included  |  |  |  |
|  | <b>Incomplete abortion with sepsis</b>                         | -              | -  | -        | 52(5)<br>29(4) | 81 | Included  | -                          | -    | -         |  |  |  |
|  | <b>Perianal abscess with sepsis</b>                            | 28(5)<br>34(4) | 62 | II Round | 39(5)<br>33(4) | 72 | III Round | 53.5 (Ls 4)<br>30.2 (Ls 5) | 83.7 | Included  |  |  |  |
|  | <b>Intraperitoneal bladder rupture</b>                         | -              | -  | -        | 37(5)<br>35(4) | 72 | III Round | 25.6 (Ls 4)<br>41.9 (Ls 5) | 67.5 | Cancelled |  |  |  |
|  | <b>Compartment syndrome (any districts)</b>                    | -              | -  | -        | 66(5)<br>15(4) | 81 | Included  | -                          | -    | -         |  |  |  |

|  |                                                       |                |    |          |                |    |           |                            |      |                                                        |  |  |  |
|--|-------------------------------------------------------|----------------|----|----------|----------------|----|-----------|----------------------------|------|--------------------------------------------------------|--|--|--|
|  | Foreign body with obstruction (including endoscopy)   | -              | -  | -        | 29(5)<br>35(4) | 64 | III Round | 16.3 (Ls 4)<br>44.2 (Ls 5) | 60.5 | <b>Cancelled</b>                                       |  |  |  |
|  | <b>Liver transplant</b>                               | 54(5)<br>25(4) | 79 | Included | -              | -  |           |                            |      | Cancelled after discussion at WSES World Congress 2022 |  |  |  |
|  | Embolization of splenic post-traumatic pseudoaneurysm | -              | -  | -        | 41(5)<br>31(4) | 72 | III Round | 23.3 (Ls 4)<br>32.6 (Ls 5) | 55.9 | <b>Cancelled</b>                                       |  |  |  |

**GREEN  
-surgery  
within  
12 hrs**

|                       |                |    |          |                |    |                                                                                          |  |  |  |  |  |  |  |  |
|-----------------------|----------------|----|----------|----------------|----|------------------------------------------------------------------------------------------|--|--|--|--|--|--|--|--|
| Bowel obstruction     | 45(5)<br>17(4) | 62 | II Round | 37(5)<br>29(4) | 66 | Im-<br>proved<br>defini-<br>tion for<br>III<br>Round<br>and<br>moved<br>to Blue<br>class |  |  |  |  |  |  |  |  |
| Perianal ab-<br>scess | 37(5)<br>34(4) | 71 | II Round | 41(5)<br>23(4) | 64 | Moved<br>to Blue<br>class                                                                |  |  |  |  |  |  |  |  |

|                                      |                |    |          |                |    |                     |                            |      |                                  |  |  |  |  |
|--------------------------------------|----------------|----|----------|----------------|----|---------------------|----------------------------|------|----------------------------------|--|--|--|--|
| Cholecystitis                        | 34(5)<br>23(4) | 57 | II Round | 35(5)<br>25(4) | 60 | Moved to Blue class |                            |      |                                  |  |  |  |  |
| Appendicitis                         | 45(5)<br>28(4) | 73 | II Round | 62(5)<br>21(4) | 83 | Included            |                            |      |                                  |  |  |  |  |
| Thoracic empyema                     | 37(5)<br>40(4) | 77 | included | -              | -  | -                   |                            |      |                                  |  |  |  |  |
| Incarcerated hernia with obstruction | 40(5)<br>20(4) | 60 | II Round | 55(5)<br>18(4) | 73 | III Round           | 32.6 (Ls 4)<br>30.2 (Ls 5) | 62.8 | Moved to Blue class for IV Round |  |  |  |  |
| Urinary fistula                      | 23(5)<br>23(4) | 46 | II Round | 39(5)<br>22(4) | 61 | Cancelled           | -                          |      |                                  |  |  |  |  |
| Hydronephrosis                       | 34(5)<br>28(4) | 62 | II Round | 31(5)<br>25(4) | 56 | III Round           | 20.9 (Ls 4)<br>30.2 (Ls 5) | 51.1 | Cancelled                        |  |  |  |  |



|  |                                                              |   |   |   |   |   |                                           |                            |      |                                                 |                    |      |                  |
|--|--------------------------------------------------------------|---|---|---|---|---|-------------------------------------------|----------------------------|------|-------------------------------------------------|--------------------|------|------------------|
|  | Bowel/intestinal obstruction after medical treatment failure | - | - | - | - | - | III Round(moved from green to blue class) | 27.9 (Ls 4)<br>41.9 (Ls 5) | 69.8 | IV Round                                        | 18.8(4)<br>31.3(5) | 50.1 | <b>Cancelled</b> |
|  | <b>Perianal abscess</b>                                      | - | - | - | - | - | III Round(moved from green to blue class) | 34.9 (Ls 4)<br>37.2 (Ls 5) | 72.1 | Included after discussion at WSES congress 2022 |                    |      |                  |

|  |                      |   |   |   |   |   |                                                              |                            |      |                        |  |  |  |
|--|----------------------|---|---|---|---|---|--------------------------------------------------------------|----------------------------|------|------------------------|--|--|--|
|  | <b>Cholecystitis</b> | - | - | - | - | - | III<br>Round(<br>moved<br>from<br>green to<br>blue<br>class) | 23.3 (Ls 4)<br>55.8 (Ls 5) | 79.1 | <b>Included</b>        |  |  |  |
|  | Urinary fistula      | - | - | - | - | - | III<br>Round(<br>moved<br>from<br>green to<br>blue<br>class) | 11.6 (Ls 4)<br>37.2 (Ls 5) | 48.8 | <b>Can-<br/>celled</b> |  |  |  |

|                                                               |                |    |          |                |    |                  |                                         |                            |                  |                  |  |  |  |
|---------------------------------------------------------------|----------------|----|----------|----------------|----|------------------|-----------------------------------------|----------------------------|------------------|------------------|--|--|--|
| Foreign body without obstruction                              | -              | -  | -        | -              | -  | -                | III<br>(moved from green to blue class) | 16.3 (Ls 4)<br>53.5 (Ls 5) | 69.8             | <b>Cancelled</b> |  |  |  |
| Acute appendicitis without peritoneal fluid                   | 45(5)<br>20(4) | 65 | II Round | 60(5)<br>14(4) | 74 | III round        | 14 (Ls 4)<br>51.2 (Ls 5)                | 65.2                       | <b>Cancelled</b> |                  |  |  |  |
| Amputation for osteomyelitis                                  | 31(5)<br>34(4) | 65 | II Round | 58(5)<br>12(4) | 70 | III Round        | 32.6 (Ls 4)<br>37.2 (Ls 5)              | 69.8                       | <b>Cancelled</b> |                  |  |  |  |
| A-V fistulae for hemodialysis                                 | 31(5)<br>25(4) | 56 | II Round | 54(5)<br>16(4) | 70 | III Round        | 23 (Ls 4)<br>27 (Ls 5)                  | 50                         | <b>Cancelled</b> |                  |  |  |  |
| Symptomatic carotid artery stenosis, TIA, STROKE in evolution | 37(5)<br>25(4) | 62 | II Round | 37(5)<br>30(4) | 67 | <b>Cancelled</b> |                                         |                            |                  |                  |  |  |  |



|                                                                |                |    |          |                    |      |                  |                            |      |                  |  |  |  |  |
|----------------------------------------------------------------|----------------|----|----------|--------------------|------|------------------|----------------------------|------|------------------|--|--|--|--|
| Symptomatic AAA after medical treatment failure                | 42(5)<br>25(4) | 67 | II Round | 41.2(5)<br>29.4(4) | 70.6 | <b>Cancelled</b> |                            |      |                  |  |  |  |  |
| Symptomatic aortic dissection type B                           | 45(5)<br>25(4) | 70 | II Round | 41(5)<br>18 (4)    | 59   | <b>Cancelled</b> |                            |      |                  |  |  |  |  |
| Bones fracture/complicated bones fractures (displaced/complex) | 37(5)<br>31(4) | 68 | II Round | 43(5)<br>25(4)     | 68   | III Round        | 30.2 (Ls 4)<br>34.9 (Ls 5) | 65.1 | <b>Cancelled</b> |  |  |  |  |
| <b>Pelvic trauma fixation</b>                                  | 28(5)<br>43(4) | 71 | II Round | 53(5)<br>25(4)     | 78   | <b>included</b>  |                            |      |                  |  |  |  |  |
| Maxillofacial fractures                                        | 43(5)<br>25(4) | 68 | II Round | 49(5)<br>23(4)     | 72   | III Round        | 18.6 (Ls 4)<br>39.5 (Ls 5) | 58.1 | <b>Cancelled</b> |  |  |  |  |
| Urolithiasis                                                   | 25(5)<br>37(4) | 62 | II Round | 37(5)<br>25(4)     | 62   | <b>Cancelled</b> |                            |      |                  |  |  |  |  |

|                                                |                                               |                |    |          |                |    |          |   |   |   |                    |      |                  |
|------------------------------------------------|-----------------------------------------------|----------------|----|----------|----------------|----|----------|---|---|---|--------------------|------|------------------|
|                                                | Incarcerated<br>AW hernia<br>with obstruction | -              | -  | -        | -              | -  | -        | - | - | - | 28.1(4)<br>31.3(5) | 59.4 | <b>Cancelled</b> |
| <b>OR-<br/>GANI-<br/>ZA-<br/>TIVE<br/>NEED</b> | <b>Elective postponed interventions</b>       | 37(5)<br>28(4) | 65 | II Round | 54(5)<br>23(4) | 77 | Included |   |   |   |                    |      |                  |
|                                                | <b>Diagnostic biopsy/laparoscopy</b>          | 31(5)<br>31(4) | 62 | II Round | 58(5)<br>17(4) | 75 | Included |   |   |   |                    |      |                  |

**Table 5: Summary of all rounds voting results (CCA: Collective Consensus Agreement)**
